# Supplementary material for: Synthesis, crystal structure, and thermoelectric properties of two new barium antimony selenides: Ba2Sb2Se5and Ba6Sb7Se16.11
Source: Royal Society of Chemistry journal article supplement (doi:10.1039/c5tc01721a), 2015-01-01
Supplement: c5tc01721a5.pdf [file c5tc01721a5.pdf]

# Synthesis, Crystal Structure, and Thermoelectric Properties of Two New Barium Antimony Selenides: $\text{Ba}_2\text{Sb}_2\text{Se}_5$ and $\text{Ba}_6\text{Sb}_7\text{Se}_{16.11}$

Jian Wang, Kathleen Lee, Kirill Kovnir\*

*Department of Chemistry, University of California, Davis,*

*One Shields Avenue, Davis, CA 95616*

## Supporting Information

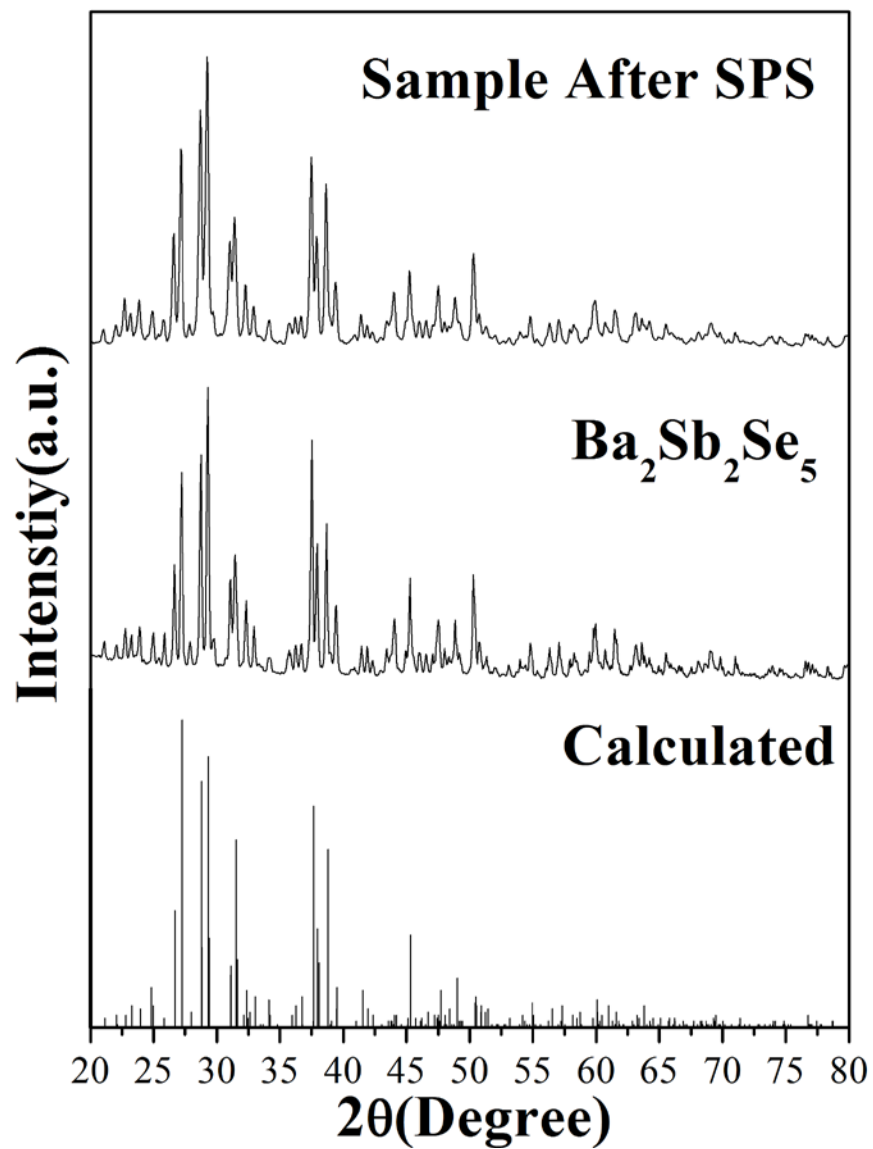

**Figure S1.** Powder X-ray diffraction patterns of Ba<sub>2</sub>Sb<sub>2</sub>Se<sub>5</sub> before (middle) and after (top) the SPS process. Calculated pattern is shown on the bottom.

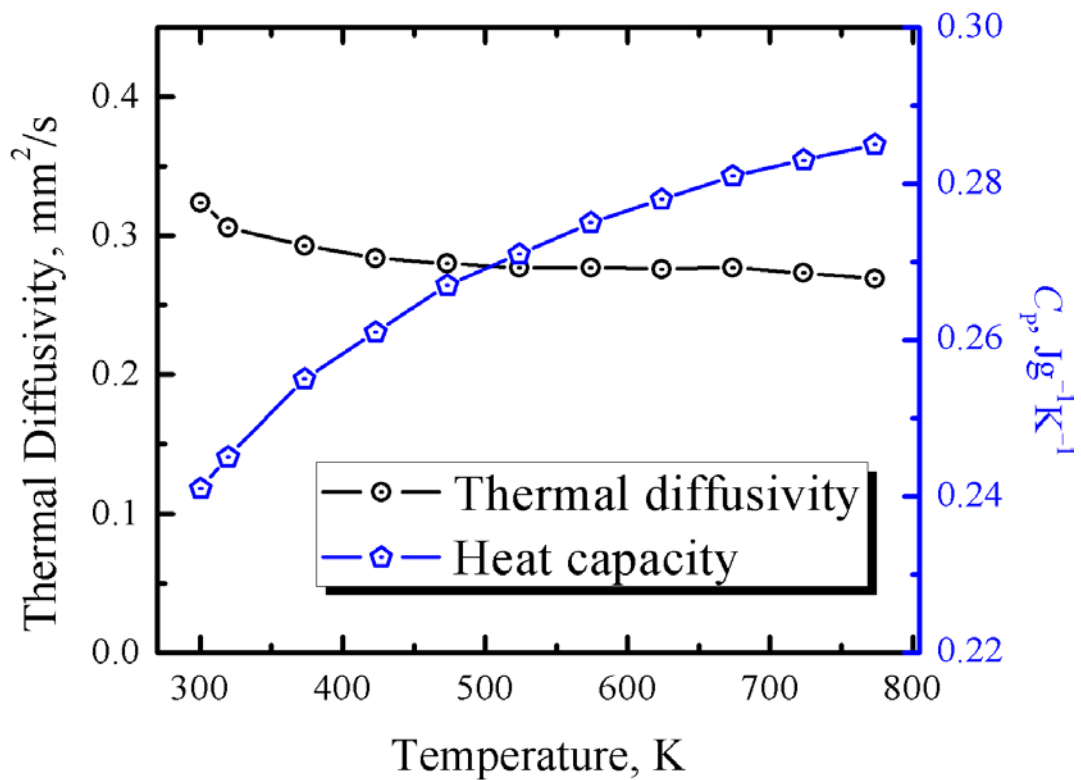

**Figure S2.** Temperature dependences of the thermal diffusivity (black) and heat capacity (blue) for Ba<sub>2</sub>Sb<sub>2</sub>Se<sub>5</sub>.

**Table S1.** EDX spectroscopy results for selected samples of  $\text{Ba}_2\text{Sb}_2\text{Se}_5$ . The compositions were normalized to 2 Sb atoms.

| Spectrum                                                                                                                                 | Composition                                   |
|------------------------------------------------------------------------------------------------------------------------------------------|-----------------------------------------------|
| 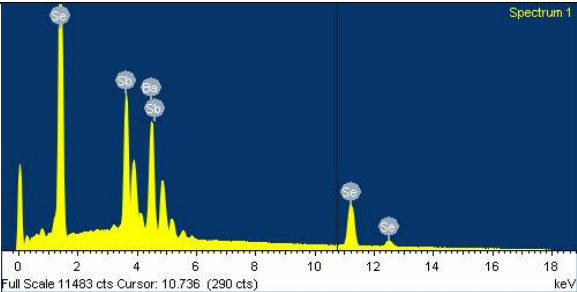 <p>Full Scale 11483 cts Cursor: 10.736 (290 cts)</p>   | $\text{Ba}_{2.03}\text{Sb}_2\text{Se}_{4.94}$ |
|  <p>Full Scale 10221 cts Cursor: 10.736 (197 cts)</p>  | $\text{Ba}_{1.99}\text{Sb}_2\text{Se}_{4.77}$ |
|  <p>Full Scale 10221 cts Cursor: 10.736 (197 cts)</p> | $\text{Ba}_{2.01}\text{Sb}_2\text{Se}_{4.99}$ |

**Table S2.** EDX spectroscopy results for selected samples of  $\text{Ba}_6\text{Sb}_7\text{Se}_{16.11}$ . The compositions were normalized to 7 Sb atoms. The admixtures contained in the samples prevent accurate composition determination.

| Spectrum                                                                                                                               | Composition                                   |
|----------------------------------------------------------------------------------------------------------------------------------------|-----------------------------------------------|
| 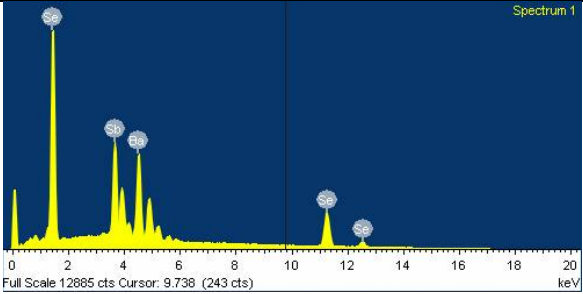 <p>Full Scale 12885 cts Cursor: 9.738 (243 cts)</p>  | $\text{Ba}_{7.85}\text{Sb}_7\text{Se}_{17.1}$ |
|  <p>Full Scale 14572 cts Cursor: -0.368 (0 cts)</p>  | $\text{Ba}_{7.93}\text{Sb}_7\text{Se}_{17.8}$ |
|  <p>Full Scale 14572 cts Cursor: -0.368 (0 cts)</p> | $\text{Ba}_{7.78}\text{Sb}_7\text{Se}_{18.7}$ |

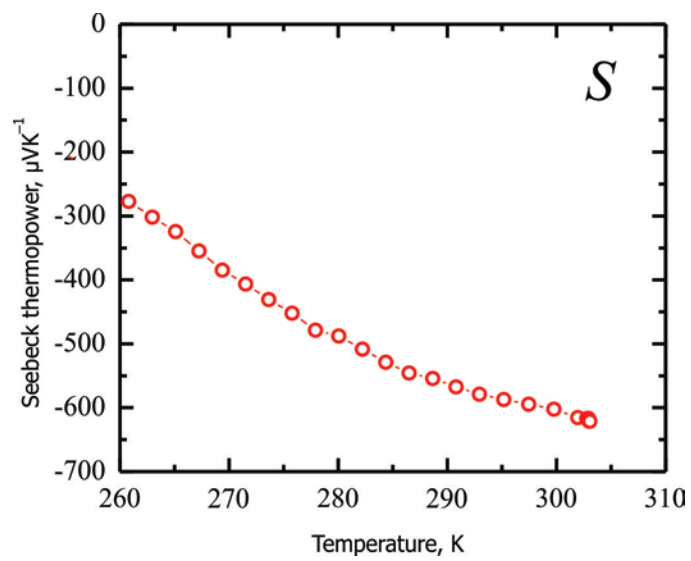

Figure S3. Temperature dependence of the Seebeck thermopower of  $\text{Ba}_2\text{Sb}_2\text{Se}_5$ .

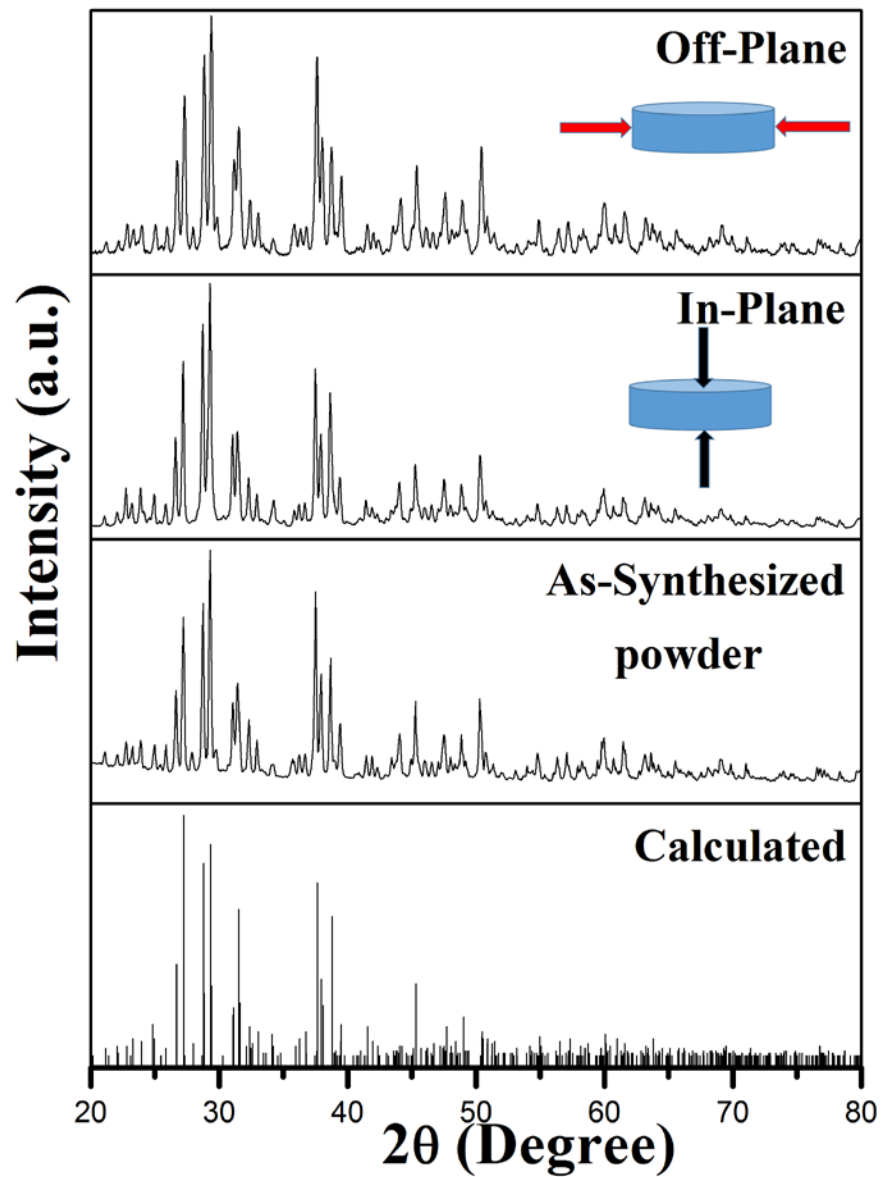

Figure S4. Powder X-ray diffraction patterns of  $\text{Ba}_2\text{Sb}_2\text{Se}_5$  SPS-pellet measured off-plane (top) and in-plane (middle). Calculated pattern is shown on the bottom.
